# Supplementary material
Source: PubMed Central journal article supplement (PMC4392802)

### **Supplemental Figure 1 Cortisone: d3-cortisone ratio**

Data are mean  $\pm$  SEM for the ratio of cortisone to d3-cortisone during deuterated cortisol infusion prior to and following carbohydrate (CHO, filled squares), fat (filled circles), protein (filled triangles) and placebo (open diamonds) meals (n=8 for all meals). The ratio was similar at steady state prior to all meals. The cortisone:d3-cortisone ratio increased following carbohydrate, protein and fat meals ( $p < 0.05$  vs placebo) but declined following placebo.

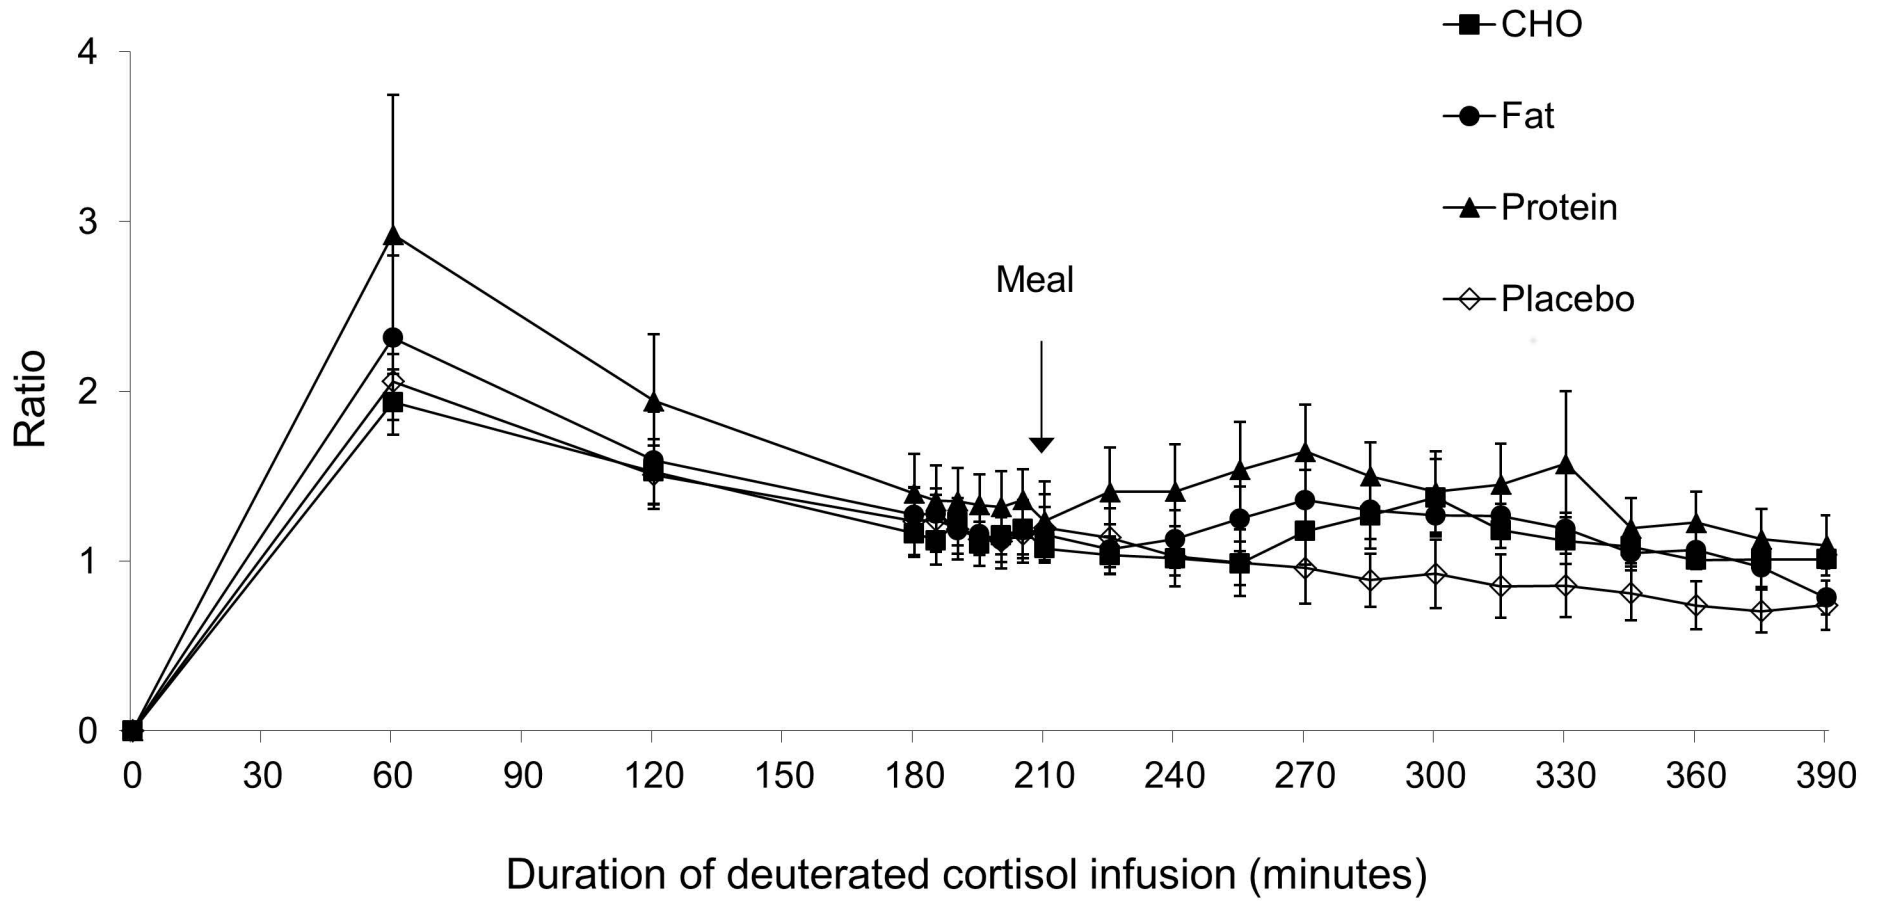

Supplement: NIHMS62857-supplement-Suppl_Fig_1.pdf [file NIHMS62857-supplement-Suppl_Fig_1.pdf]
